# Supplementary material
Source: MDPI journal article supplement (https://www.mdpi.com/2076-3417/14/3/1094)
Supplement: s1 [file s1]

Archive with 2 entries (2 files):
- TABLE_S1_ADME_SAL_DIT.pdf
- TABLE_S2_ADME_DITHRANOL.pdf
